# Supplementary material for: Investigating the Impact of Humic Acid on Copper Accumulation in Sinonovacula constricta Using a Toxicokinetic–Toxicodynamic Model
Source: MDPI journal article supplement (doi:10.3390/toxics12010074), 2024-01-15
Supplement: s1 [file s1]

## Supporting Information

**Table S1.** Measured concentrations of  $^{65}\text{Cu}$  ( $\mu\text{g L}^{-1}$ ) in the exposure seawater of different humic acid used in the accumulation experiment.

| Nominal $^{65}\text{Cu}$ concentration = $15 \mu\text{g L}^{-1}$ |                                   |      |      |      |
|------------------------------------------------------------------|-----------------------------------|------|------|------|
| Time (h)                                                         | Humic acid ( $\text{mg L}^{-1}$ ) |      |      |      |
|                                                                  | 0                                 | 5    | 10   | 20   |
| 0                                                                | 13.3                              | 11.8 | 11.7 | 11.2 |
| 3                                                                | 8.6                               | 10.0 | 9.1  | 8.9  |
| 6                                                                | 7.4                               | 8.7  | 7.9  | 8.9  |
| 9                                                                | 6.9                               | 8.4  | 7.5  | 7.2  |
| 12                                                               | 5.9                               | 7.3  | 6.5  | 6.7  |

| Nominal $^{65}\text{Cu}$ concentration = $150 \mu\text{g L}^{-1}$ |                                   |     |     |     |
|-------------------------------------------------------------------|-----------------------------------|-----|-----|-----|
| Time (h)                                                          | Humic acid ( $\text{mg L}^{-1}$ ) |     |     |     |
|                                                                   | 0                                 | 5   | 10  | 20  |
| 0                                                                 | 136                               | 146 | 143 | 134 |
| 3                                                                 | 125                               | 113 | 128 | 123 |
| 6                                                                 | 148                               | 109 | 110 | 110 |
| 9                                                                 | 94                                | 86  | 97  | 107 |
| 12                                                                | 84                                | 80  | 91  | 104 |

| Nominal $^{65}\text{Cu}$ concentration = $300 \mu\text{g L}^{-1}$ |                                   |     |     |     |
|-------------------------------------------------------------------|-----------------------------------|-----|-----|-----|
| Time (h)                                                          | Humic acid ( $\text{mg L}^{-1}$ ) |     |     |     |
|                                                                   | 0                                 | 5   | 10  | 20  |
| 0                                                                 | 268                               | 257 | 241 | 260 |
| 3                                                                 | 224                               | 216 | 203 | 223 |
| 6                                                                 | 201                               | 197 | 182 | 202 |
| 9                                                                 | 197                               | 169 | 161 | 186 |
| 12                                                                | 178                               | 141 | 149 | 171 |
